# Supplementary material for: Development of antibacterial compounds that constrain evolutionary pathways to resistance
Source: eLife. 2021 Jul 19;10:e64518. doi: 10.7554/eLife.64518 (PMC8331180; doi:10.7554/eLife.64518)
Supplement: Supplementary file 1. [file elife-64518-supp1.xlsx]

## Sheet: ID & Properties
Hits Information
Compound ID	Source Database	Compound Code (ChemDiv)	Docking Score	Glide RMSD(XP to SP)	Calculated ΔG for WT MD	Molecular_Weight	Num_H_Donors	Num_H_Acceptors	ALogP	Num_RotatableBonds	Num_Rings	Num_AromaticRings	Molecular_FractionalPolarSurfaceArea	ECFP4 Similarity with known DHFR inhibitors
CD01	ChemDiv	4361-0444	-6.969	0.449	-31.5434	341.114	3	5	0.95	4	2	1	0.381	0.195
CD02	ChemDiv	6773-1654	-9.195	0.161	-28.8315	334.395	2	6	2.355	2	3	2	0.403	0.191
CD03	ChemDiv	8019-6404	-7.433	0.003	-26.8665	232.199	5	5	-1.927	0	3	2	0.647	0.19
CD04	ChemDiv	8011-5588	-9.354	0.414	-26.6928	179.214	2	0	0.751	2	2	2	0.246	0.16
CD05	ChemDiv	8019-8601	-8.003	0.338	-21.6268	241.209	1	1	2.869	3	2	2	0.18	0.308
CD06	ChemDiv	D043-0124	-6.264	0.104	-21.0051	255.275	2	5	1.987	2	3	2	0.35	0.322
CD07	ChemDiv	7999-4501	-5.317	0.032	-36.1237	346.338	3	7	0.365	4	3	1	0.371	0.297
CD08	ChemDiv	7999-4516	-7.295	0.843	-26.7354	302.285	4	6	0.155	2	3	1	0.446	0.289
CD09	ChemDiv	7999-4493	-5.343	0	-20.0006	270.287	3	4	0.9	1	3	1	0.377	0.283
CD10	ChemDiv	8020-4876	-6.782	0.142	-30.0895	349.405	2	6	1.936	5	3	2	0.326	0.258
CD11	ChemDiv	8020-0785	-6.778	0.458	-30.0551	349.362	2	7	1.165	3	4	2	0.421	0.203
CD12	ChemDiv	8020-5139	-7.117	0.066	-27.2229	284.336	2	4	1.864	2	3	2	0.393	0.239
CD13	ChemDiv	8009-3393	-6.826	0.015	-24.144	327.252	3	7	0.556	2	3	1	0.543	0.264
CD14	ChemDiv	D364-1686	-5.992	0.262	-36.2852	448.493	2	8	2.217	6	3	1	0.331	0.195
CD15	ChemDiv	D364-0564	-5.502	0.061	-33.758	346.338	3	7	0.606	4	3	1	0.339	0.19
CD16	ChemDiv	4891-2123	-6.856	0.471	-24.5824	405.403	2	5	2.979	6	4	3	0.262	0.182
CD17	ChemDiv	3739-0010	-6.906	0.01	-20.2322	334.281	3	7	0.661	6	2	1	0.417	0.208
CD18	ChemDiv	5042-0801	-6.756	0.938	-26.8081	338.357	1	5	2.034	4	4	2	0.263	0.16
CD19	ChemDiv	8004-4149	-6.742	0.397	-21.7946	292.16	1	2	4.284	3	2	2	0.159	0.203
CD20	ChemDiv	8005-2585	-6.42	0.001	-21.3493	213.283	2	6	0.981	1	2	2	0.702	0.261
CD21	ChemDiv	3729-2217	-6.569	0.004	-20.5617	244.676	1	2	3.198	1	3	3	0.231	0.196
CD22	ChemDiv	4449-1085	-5.952	0.153	-28.0843	447.236	3	6	2.665	6	3	2	0.302	0.191
CD23	ChemDiv	1016-0032	-6.26	0.55	-22.5553	309.298	3	7	1.981	4	2	1	0.529	0.193
CD24	ChemDiv	5107-0106	-6.416	0.588	-21.2305	261.237	3	8	0.684	4	2	1	0.482	0.164
CD25	ChemDiv	4965-0168	-5.443	0.175	-20.8519	218.255	2	4	0.918	0	3	2	0.349	0.2
CD26	ChemDiv	0929-0063	-5.397	0.431	-20.1826	265.285	1	5	1.909	3	2	1	0.362	0.232
CD27	ChemDiv	D451-1524	-5.835	0.048	-27.349	383.871	2	2	3.995	4	3	2	0.165	0.184
CD28	ChemDiv	8017-8695	-5.127	0.449	-20.8242	371.347	2	7	0.614	4	4	2	0.337	0.224
CD29	ChemDiv	8011-1945	-7.227	0.775	-20.928	333.342	2	4	0.475	2	3	1	0.341	0.235
CD30	ChemDiv	7706-1220	-7.933	0.922	-20.2773	342.346	2	6	0.846	4	3	1	0.302	0.192
CD31	ChemDiv	D364-1754	-5.767	0.201	-34.8552	388.375	2	7	0.473	4	3	1	0.321	0.182
CD32	ChemDiv	F2209-0009	-7.011	3.378	-22.1619	281.306	1	3	3.552	3	3	3	0.235	0.258
Compound ID	Source Database	Compound Code (Life Chemicals)	docking score	glide rmsd(XP to SP)	ΔG for WT MD	Molecular_Weight	Num_H_Donors	Num_H_Acceptors	ALogP	Num_RotatableBonds	Num_Rings	Num_AromaticRings	Molecular_FractionalPolarSurfaceArea	ECFP4 Similarity with known DHFR inhibitors
LC01	Life Chemicals	F9995-0268	-8.157	0.007	-29.2146	195.218	3	2	1.429	1	2	2	0.583	0.185
LC02	Life Chemicals	F6497-6796	-6.351	0.056	-27.1069	382.392	3	4	2.288	4	4	3	0.337	0.167
LC03	Life Chemicals	F1967-0017	-5.632	0.056	-20.5516	255.633	2	3	1.421	1	2	1	0.336	0.302
LC04	Life Chemicals	F3184-0059	-6.377	6.596	-20.3071	397.448	2	7	3.086	6	3	2	0.337	0.216
LC05	Life Chemicals	F6497-5769	-6.856	0.963	-26.8485	447.508	2	6	0.637	5	4	2	0.356	0.169
LC06	Life Chemicals	F6497-5836	-7.509	0.178	-21.0728	338.813	2	3	2.245	3	3	2	0.386	0.16
LC07	Life Chemicals	F6497-5805	-6.604	0.19	-20.9036	365.386	2	4	2.525	4	4	3	0.34	0.167
LC08	Life Chemicals	F1765-0082	-7.538	0.439	-30.3263	353.372	2	6	1.202	4	3	1	0.304	0.23
Compound ID	SourceName	Compound code (ChemDiv)	docking score	glide rmsd to input	MD ΔG for WT	Molecular_Weight	Num_H_Donors	Num_H_Acceptors	ALogP	Num_RotatableBonds	Num_Rings	Num_AromaticRings	Molecular_FractionalPolarSurfaceArea	PLIF Similarity with CD15 or CD17
CD15	ChemDiv	D364-0564	-6.25604	0.000508593	-33.7585	346.338	3	7	0.606	4	3	1	0.339	1
CD15-1	ChemDiv	D364-0563	-6.08927	0.000515066	-31.2053	330.339	3	6	0.971	4	3	1	0.329	1
CD15-2	ChemDiv	D364-0577	-6.60149	0.000486863	-33.2311	332.311	4	7	0.38	3	3	1	0.396	0.888889
CD15-3	ChemDiv	D364-0578	-6.03378	0.000478632	-32.0924	336.345	3	5	1.547	2	4	2	0.306	0.875
CD15-4	ChemDiv	D364-0576	-5.68618	0.000537371	-28.0196	330.295	3	7	0.407	2	4	1	0.384	0.875
CD15-5	ChemDiv	8012-9116	-5.80212	0.000484122	-25.3661	289.247	4	6	-0.939	3	2	1	0.485	0.777778
CD15-6	ChemDiv	D364-0566	-6.15029	0.000551255	-30.6633	376.364	3	8	0.59	5	3	1	0.334	0.5
CD17	ChemDiv	3739-0010	-7.03781	0.638368	-20.2322	334.281	3	7	0.661	6	2	1	0.417	1
CD17-1	ChemDiv	2817-0146	-7.86678	0.263475	-21.6478	369.124	3	6	1.077	4	2	1	0.406	0.928571
CD17-2	ChemDiv	2897-1527	-7.5785	0.121078	-20.4443	320.254	3	7	0.313	5	2	1	0.438	0.785714
CD17-3	ChemDiv	3699-1145	-7.37486	0.000519057	-25.8907	304.255	3	6	0.813	4	2	1	0.43	0.625
CD17-4	ChemDiv	2897-0417	-7.60012	0.000476722	-22.3569	359.118	3	6	1.658	4	2	1	0.39	0.6
CD17-5	ChemDiv	8008-9070	-7.08577	0.000507706	-21.9572	266.252	2	3	1.772	1	3	2	0.313	0.5
CD17-6	ChemDiv	2817-0079	-7.40136	0.000547571	-23.7716	445.22	3	6	2.809	5	3	2	0.33	0.470588

## Sheet: Patent Information
Compound ID	Source Database	IDNUMBER (ChemDiv)	Canonical_Smiles	Cluster Group	Similarity (>99%)	Whether DHFR inhibitor or not	Has Patent or not (Markush)	Number of References_Simarity search	Reported Targets	Related Dieases
CD01	ChemDiv	4361-0444	OC(=O)COc1ccc(\C=C/2\NC(=O)NC2=O)cc1Br	0	1	sepiapterin reductase inhibitors	4	0	cytokines, phosphodiesterase IV	cardiovascular agents
CD02	ChemDiv	6773-1654	COc1ccc(C2C(=C(N)SC(=C2C#N)N)C#N)c3ccccc13	0	1	No	0	0	alkylation reagents	No
CD03	ChemDiv	8019-6404	Nc1c2NC(=O)C(=O)Nc2c(N)c3[nH]cnc13	0	2	No	0	0	No	No
CD04	ChemDiv	8011-5588	[NH3+]CCc1c[nH]c2ccc(F)cc12	0	7	No	0	166	myeloperoxidase, acetylcholinesterase (AChE), 5-​HT receptor,	inflammatory syndrome, antitumor agents, cancer, tuberculosis
CD05	ChemDiv	8019-8601	NCc1oc(cc1)c2cccc(c2)C(F)(F)F	0	2	bacterial infections	84	1	MCHr1 antagonists	No
CD06	ChemDiv	D043-0124	CC1=C(Cc2ccccc2)C(=O)n3nc(N)nc3N1	0	1	No	1	1	CCR2b receptor antagonists	No
CD07	ChemDiv	7999-4501	COc1ccc([C@H]2CC(=O)NC3=C2C(=O)NC(=N3)N)c(OC)c1OC	1	2	No	0	2	HCV inhibitors	No
CD08	ChemDiv	7999-4516	COc1cc(ccc1O)[C@H]2CC(=O)NC3=C2C(=O)NC(=N3)N	1	1	No	0	2	cyclin-​dependent kinase 7	No
CD09	ChemDiv	7999-4493	Cc1ccc(cc1)[C@H]2CC(=O)NC3=C2C(=O)NC(=N3)N	1	1	No	0	0	cyclin-​dependent kinase 11	No
CD10	ChemDiv	8020-4876	CNc1nc2NC(=O)C[C@H](c3cc(OC)c(OC)c(OC)c3)c2s1	2	1	No	0	0	No	No
CD11	ChemDiv	8020-0785	COc1c(OC)c(cc2OCOc12)[C@H]3CC(=O)Nc4nc(N)sc34	2	1	No	0	0	No	No
CD12	ChemDiv	8020-5139	CNc1nc2NC(=O)C[C@H](c3ccc(cc3)C#N)c2s1	2	1	No	0	0	No	No
CD13	ChemDiv	8009-3393	NC1=C(C#N)[C@@H](C2=C(NC(=O)NC2=O)O1)c3ccc(cc3)[N+](=O)[O-]	3	0	Antimicrobial Activity	0	39	No	No
CD14	ChemDiv	D364-1686	CCC(=O)N1N=C(C[C@H]1c2cc(OC)c(OC)c(OC)c2)C3=C(O)NC(=S)N(C)C3=O	5	0	No	0	0	No	No
CD15	ChemDiv	D364-0564	COc1ccc(cc1OC)[C@@H]2CC(=NN2)C3=C(O)NC(=O)N(C)C3=O	5	0	No	0	0	No	No
CD16	ChemDiv	4891-2123	COc1ccccc1OCCn2cc(C=C3C(=O)NC(=O)NC3=O)c4ccccc24	6	1	No	0	0	No	No
CD17	ChemDiv	3739-0010	CCOc1cc(C=C2C(=O)NC(=O)NC2=O)ccc1OCC(=O)O	6	1	No	1	1	Human Bitter Taste Receptors, Hsp 90 inhibitors	Anticancer agents
CD18	ChemDiv	5042-0801	Nc1ccc(Oc2ccc3C(=O)N(C[C@@H]4CCCO4)C(=O)c3c2)cc1	7	1	No	0	1	LPA3 antagonists	No
CD19	ChemDiv	8004-4149	Nc1ccc(cc1)C(=O)\C=C\c2ccc(Cl)cc2Cl	7	1	antimicrobial activity, Staphylococcus aureus, anti-​inflammatory agents	120	6	amyloid aggregation inhibitors	antitumor activity, antimicrobial activity, prophylaxis of diseases caused by parasites or bacteria
CD20	ChemDiv	8005-2585	CSc1nc2nc(N)nc(N)c2s1	8	2	bacterial infection	6	3	bacterial NadD inhibitors, adenylosuccinate synthetase	Duchenne Muscular Dystrophy
CD21	ChemDiv	3729-2217	Nc1ccc2oc(nc2c1)c3ccccc3Cl	8	1	inhibitors of protein NS5A of hepatitis C virus, inflammation	132	4	Upregulators of Utrophin Production, Jak inhibitors, PCSK9 expression inhibitory and blood LDL cholesterol-​lowering activities, PARP inhibitors	muscular dystrophy and cachexia, anticancer supplement agents
CD22	ChemDiv	4449-1085	COc1cc(\C=C/2\NC(=O)NC2=O)cc(Br)c1OCc3cccc(c3)C(=O)O	9	2	No	1	1	Pyruvate kinase M2 inhibitors	No
CD23	ChemDiv	1016-0032	CCOc1cc(\C=C/2\SC(=N)NC2=O)cc(c1O)[N+](=O)[O-]	9	0	No	0	3	GPR35 and modulators, acid-​stabilized insulin analogs	metabolic-​related disorders
CD24	ChemDiv	5107-0106	COC(=O)c1ccccc1N\N=C\2/C(=N)ON=C2N	9	0	No	0	1	No	No
CD25	ChemDiv	4965-0168	CC1(C)Cc2nc3[nH]nc(N)c3cc2CO1	9	1	No	0	3	altering the lifespan of eukaryotic organisms	No
CD26	ChemDiv	0929-0063	COc1ccc(\C=C/2\SC(=O)NC2=O)cc1OC	9	6	bacterial peptide deformylase inhibitors, fungicidal activity	137	27	bacterial peptide deformylase inhibitors, PPAR agonists, PDE4 inhibitors,nucleotide exchange factor SOS1 inhibitors	antibacterial agents, anticancer agents, autoimmune diseases ,tyrosine kinase inhibitors
CD27	ChemDiv	D451-1524	CC(C)N(CC1=CC(=O)Nc2ccccc12)C(=O)Nc3ccc(C)c(Cl)c3	10	1	No	0	0	No	No
CD28	ChemDiv	8017-8695	COc1cc(cc(OC)c1OC)[C@@H]2CC(=O)NC3=C2C(=O)Nc4ncnn34	10	1	No	0	0	No	No
CD29	ChemDiv	8011-1945	C[C@H]1NC(=O)N(C)[C@H]2NC(=O)N(C)[C@@H]([C@@H]12)c3ccc(cc3)[N+](=O)[O-]	10	0	No	0	0	No	No
CD30	ChemDiv	7706-1220	COC(=O)C1=C(N)OC2=C([C@H]1c3ccccc3OC)C(=O)NC(=C2)C	10	1	No	0	0	No	No
CD31	ChemDiv	D364-1754	COc1ccc(cc1OC)[C@H]2CC(=NN2C(=O)C)C3=C(O)NC(=O)N(C)C3=O	10	0	No	0	0	No	No
CD32	ChemDiv	F267-0007	COc1cccc(c1)C(=O)c2oc3ccc(N)cc3c2C	4	1	No	0	2	antiinflammatory agents.	No
Compound ID	Source Database	IDNUMBER (ChemDiv)	Canonical_Smiles	Cluster Group	Similarity (>99%)	Whether DHFR inhibitor or not	Has Patent or not (Markush)	Number of References_Simarity search	Reported Targets	Related Dieases
LC01	Life Chemicals	F9995-0268	Nc1[nH+]c2ccc(cc2s1)C(=O)O	0	0	No	0	1	No	No
LC02	Life Chemicals	F6497-6796	NC(=O)c1cc(n[nH]1)C2CCN(CC2)C(=O)c3cc(n[nH]3)c4ccc(F)cc4	0	0	No	0	0	No	No
LC03	Life Chemicals	F1967-0017	NC1=CC(=O)NC(=O)N1c2ccc(F)c(Cl)c2	0	1	No	15	1	No	bone diseases, inflammation
LC04	Life Chemicals	F3184-0059	COc1cc(\C=C\2/SC(=NC2=O)N)ccc1OCC(=O)Nc3ccccc3C	0	2	No	0	1	No	altering the lifespan of a eukaryotic organism
LC05	Life Chemicals	F6497-5769	NC(=O)c1cc(n[nH]1)[C@@H]2CCCCN2C(=O)c3ccc(cc3)S(=O)(=O)N4CCOCC4	1	0	No	0	0	No	No
LC06	Life Chemicals	F6497-5836	NC(=O)c1cc(n[nH]1)[C@H]2CCCCN2C(=O)c3ccc(Cl)s3	1	0	No	0	0	No	No
LC07	Life Chemicals	F6497-5805	NC(=O)c1cc(n[nH]1)[C@@H]2CCCCN2C(=O)c3cc(on3)c4ccccc4	1	0	No	0	0	No	No
LC08	Life Chemicals	F1765-0082	CCOc1cc(ccc1OC)[C@H]2C(=C(N)OC3=C2C(=O)NC(=C3)C)C#N	2	3	No	0	0	No	altering the lifespan of eukaryotic organisms
Compound ID	Source Database	IDNUMBER (ChemDiv)	Canonical_Smiles	Cluster Group	Similarity (>99%)	Whether DHFR inhibitor or not	Has Patent or not (Markush)	Number of References_Simarity search	Reported Targets	Related Dieases
CD15	ChemDiv	D364-0564	COc1ccc(cc1OC)[C@@H]2CC(=NN2)C3=C(O)NC(=O)N(C)C3=O	5	0	No	0	0	No	No
CD15-1	ChemDiv	D364-0563	CCOc1ccc(cc1)[C@@H]2CC(=NN2)C3=C(O)NC(=O)N(C)C3=O	5	0	No	0	0	No	No
CD15-2	ChemDiv	D364-0577	COc1ccc(cc1O)[C@@H]2CC(=NN2)C3=C(O)NC(=O)N(C)C3=O	5	0	No	0	0	No	No
CD15-3	ChemDiv	D364-0578	CN1C(=O)NC(=C(C2=NN[C@@H](C2)c3cccc4ccccc34)C1=O)O	5	0	No	0	0	No	No
CD15-4	ChemDiv	D364-0576	CN1C(=O)NC(=C(C2=NN[C@@H](C2)c3ccc4OCOc4c3)C1=O)O	5	0	No	0	0	No	No
CD15-5	ChemDiv	8012-9116	C\C(=N/NC(=O)c1ccncc1)\C2=C(O)NC(=O)NC2=O	5	0	No	2	0	No	anti-​aging, agrochemical herbicides
CD15-6	ChemDiv	D364-0566	COc1cc(cc(OC)c1OC)[C@@H]2CC(=NN2)C3=C(O)NC(=O)N(C)C3=O	5	0	No	0	0	No	No
CD17	ChemDiv	3739-0010	CCOc1cc(C=C2C(=O)NC(=O)NC2=O)ccc1OCC(=O)O	6	2	No	1	1	human Bitter Taste Receptors, Hsp 90 inhibitors	anticancer agents
CD17-1	ChemDiv	2817-0146	OC(=O)COc1ccc(C=C2C(=O)NC(=O)NC2=O)cc1Br	6	1	No	1	0	Hsp90 inhibitors	anticancer agents
CD17-2	ChemDiv	2897-1527	COc1cc(C=C2C(=O)NC(=O)NC2=O)ccc1OCC(=O)O	6	2	No	1	1	human Bitter Taste Receptors, Hsp 90 inhibitors	anticancer agents
CD17-3	ChemDiv	3699-1145	C[C@H](Oc1ccc(C=C2C(=O)NC(=O)NC2=O)cc1)C(=O)O	6	1	No	0	0	No	No
CD17-4	ChemDiv	2897-0417	OC(=O)COc1c(Cl)cc(C=C2C(=O)NC(=O)NC2=O)cc1Cl	6	1	No	1	0	Hsp 90 inhibitors	anticancer agents
CD17-5	ChemDiv	8008-9070	O=C1NC(=O)C(=Cc2cccc3ccccc23)C(=O)N1	6	2	No	33	22	estrogen-​receptor ligands, dihydroorotate dehydrogenase (DHODase) inhibitors	antimicrobial, antifungal
CD17-6	ChemDiv	2817-0079	OC(=O)c1ccc(COc2ccc(C=C3C(=O)NC(=O)NC3=O)cc2Br)cc1	6	1	No	1	1	No	antibacterials
