# Supplementary material for: Development of antibacterial compounds that constrain evolutionary pathways to resistance
Source: eLife. 2021 Jul 19;10:e64518. doi: 10.7554/eLife.64518 (PMC8331180; doi:10.7554/eLife.64518)
Supplement: Supplementary file 2. [file elife-64518-supp2.xlsx]

## Sheet: Sheet1
Name	Type	Minimum	Maximum	Length	Direction	Category
porin CDS	CDS	571214	572281	1068	reverse	Transporter and Pumps
Lysis protein S homolog from lambdoid prophage DLP12 CDS	CDS	572854	573069	216	forward	Phage Element
lysozyme RrrD CDS	CDS	573069	573566	498	forward	Phage Element
DLP12 prophage; murein endopeptidase CDS	CDS	573563	574024	462	forward	Phage Element
Lipoprotein bor homolog from lambdoid prophage DLP12 CDS	CDS	574056	574349	294	reverse	Phage Element
DLP12 prophage; uncharacterized protein CDS	CDS	574640	575050	411	reverse	Phage Element
DLP12 prophage; uncharacterized protein CDS	CDS	575336	575542	207	forward	Phage Element
DUF3950 domain-containing protein CDS	CDS	575707	575901	195	reverse	Phage Element
DNA-packaging protein CDS	CDS	576049	576150	102	forward	Phage Element
DNA-packaging protein NU1 homolog CDS	CDS	576290	576835	546	forward	Phage Element
tail assembly protein CDS	CDS	576810	577553	744	forward	Phage Element
SAM-dependent methyltransferase CDS	CDS	577608	578039	432	reverse	Metabolic
phage tail protein CDS	CDS	578331	578591	261	forward	Phage Element
transcriptional regulator CDS	CDS	579137	579886	750	forward	Transcription-Translation Regulation
protease 7 CDS	CDS	580136	581089	954	reverse	Transporter and Pumps
porin thermoregulatory protein EnvY CDS	CDS	581603	582364	762	reverse	Transporter and Pumps
PRK09936 family protein CDS	CDS	582547	583437	891	reverse	Transporter and Pumps
bacteriophage N4 adsorption protein A CDS	CDS	583438	586410	2973	reverse	Phage element
nfrB CDS	CDS	586397	588634	2238	reverse	Phage element
two-component sensor histidine kinase CDS	CDS	588784	590226	1443	reverse	Transporter and Pumps
DNA-binding response regulator CDS	CDS	590216	590899	684	reverse	Transporter and Pumps
cation efflux system protein CusC CDS	CDS	591056	592429	1374	forward	Transporter and Pumps
cation efflux system protein CusF CDS	CDS	592587	592919	333	forward	Transporter and Pumps
cation efflux system protein CusB CDS	CDS	592935	594158	1224	forward	Transporter and Pumps
cation efflux system protein CusA CDS	CDS	594170	597313	3144	forward	Transporter and Pumps
phenylalanine-specific permease CDS	CDS	597415	598791	1377	forward	Transporter and Pumps
miniconductance mechanosensitive channel YbdG CDS	CDS	598872	600119	1248	reverse	Transporter and Pumps
NAD(P)H-dependent oxidoreductase CDS	CDS	600227	600880	654	reverse	Metabolic
DUF419 domain-containing protein CDS	CDS	600974	601342	369	reverse	Phage element
DUF1158 domain-containing protein CDS	CDS	601407	601655	249	reverse	Phage element
weak gamma-glutamyl:cysteine ligase CDS	CDS	601721	602839	1119	reverse	Metabolic
protein HokE CDS	CDS	603292	603444	153	forward	Transcription-Translation Regulation
transposase CDS	CDS	603521	604633	1113	forward	Transposable Element
4'-phosphopantetheinyl transferase CDS	CDS	604915	605544	630	reverse	Transposable Element
ferrienterobactin receptor CDS	CDS	605710	607950	2241	reverse	Transporter and Pumps
enterochelin esterase CDS	CDS	608193	609395	1203	forward	Transporter and Pumps
enterobactin biosynthesis protein YbdZ CDS	CDS	609398	609616	219	forward	Transporter and Pumps
entF CDS	CDS	609613	613494	3882	forward	Transporter and Pumps
ferric enterobactin transporter FepE CDS	CDS	613710	614843	1134	forward	Transporter and Pumps
ferric enterobactin transport ATP-binding protein FepC CDS	CDS	614840	615655	816	reverse	Transporter and Pumps
ferric anguibactin ABC transporter permease CDS	CDS	615652	616644	993	reverse	Transporter and Pumps
ferric anguibactin ABC transporter permease CDS	CDS	616641	617645	1005	reverse	Transporter and Pumps
enterobactin exporter EntS CDS	CDS	617756	619006	1251	forward	Transporter and Pumps
ferrienterobactin-binding periplasmic protein CDS	CDS	619010	619966	957	reverse	Transporter and Pumps
isochorismate synthase EntC CDS	CDS	620341	621516	1176	forward	Transporter and Pumps
entE CDS	CDS	621526	623136	1611	forward	Transporter and Pumps
enterobactin synthase component B CDS	CDS	623150	624007	858	forward	Transporter and Pumps
2,3-dihydro-2,3-dihydroxybenzoate dehydrogenase CDS	CDS	624007	624753	747	forward	Metabolic
proofreading thioesterase EntH CDS	CDS	624756	625169	414	forward	Metabolic
carbon starvation protein A CDS	CDS	625350	627455	2106	forward	Metabolic
oxidoreductase CDS	CDS	627845	628933	1089	reverse	Metabolic
methionine aminotransferase CDS	CDS	629042	630202	1161	forward	Metabolic
phosphoadenosine phosphosulfate reductase CDS	CDS	630805	632025	1221	reverse	Metabolic
transcriptional regulator CDS	CDS	632172	633074	903	reverse	Transcription-Translation Regulation
dsbG CDS	CDS	633283	634029	747	reverse	Transcription-Translation Regulation
alkyl hydroperoxide reductase subunit C CDS	CDS	634401	634964	564	forward	Other (Chaperone)
alkyl hydroperoxide reductase subunit F CDS	CDS	635209	636774	1566	forward	Other (Stress Response Gene)
universal stress protein G CDS	CDS	636895	637323	429	reverse	Other (Stress Response Gene)
glutathione-dependent formaldehyde dehydrogenase CDS	CDS	637544	638782	1239	forward	Metabolic
nucleoside diphosphate kinase regulator CDS	CDS	639013	639423	411	reverse	Metabolic
ribonuclease I CDS	CDS	639653	640459	807	reverse	Transcription-Translation Regulation
anion permease CDS	CDS	640573	642036	1464	reverse	Transporter and Pumps
citG CDS	CDS	642087	642965	879	reverse	Metabolic
citX CDS	CDS	642940	643491	552	reverse	Metabolic
citrate lyase alpha chain CDS	CDS	643495	645027	1533	reverse	Metabolic
citrate lyase subunit beta CDS	CDS	645038	645946	909	reverse	Metabolic
citrate lyase ACP CDS	CDS	645943	646239	297	reverse	Metabolic
[citrate (pro-3S)-lyase] ligase CDS	CDS	646254	647312	1059	reverse	Metabolic
dpiB CDS	CDS	647691	649349	1659	forward	Metabolic
dpiA CDS	CDS	649318	649998	681	forward	Transcription-Translation Regulation
dcuC CDS	CDS	650039	651424	1386	reverse	Transporter and Pumps
